- 1 **Title:**
- 2 The impact factor fallacy
- 3 **Authors:**
- 4 Frieder Michel Paulus 1; Nicole Cruz 2,3; Sören Krach 1
- 5 **Affiliations:**
- 6 1 Department of Psychiatry and Psychotherapy, Social Neuroscience Lab, University of Lübeck,
- 7 Ratzeburger Allee 160, D-23538 Lübeck, Germany
- 8 2 Department of Psychological Sciences, Birkbeck, University of London, London, UK
- 9 3 Laboratoire CHArt, École Pratique des Hautes Études (EPHE), Paris, France
- 10 **Corresponding Authors:**
- 11 Frieder Paulus, phone: ++49-(0)451- 31017527, email: paulus@snl.uni-luebeck.de
- 12 Sören Krach, phone: ++49-(0)451-5001717, email: krach@snl.uni-luebeck.de
- 13 Department of Psychiatry and Psychotherapy, Social Neuroscience Lab, University of Lübeck,
- 14 Ratzeburger Allee 160, D-23538 Lübeck, Germany
- 15 **Author contributions:**
- 16 FMP, NC, and SK wrote the manuscript.
- 17 **Running title:** The impact factor fallacy
- 18 **Word count abstract:** 2221
- 19 **Word count manuscript:** 4014
- 20 **Number of tables:** 1
- 21 **Number of figures:** 0

22

## **Abstract**

23           The use of the journal impact factor (JIF) as a measure for the quality of individual  
24 manuscripts and the merits of scientists has faced significant criticism in recent years. We add to  
25 the current criticism in arguing that such an application of the JIF in policy and decision making  
26 in academia is based on false beliefs and unwarranted inferences. To approach the problem, we  
27 use principles of deductive and inductive reasoning to illustrate the fallacies that are inherent to  
28 using journal based metrics for evaluating the work of scientists. In doing so, we elaborate that if  
29 we judge scientific quality based on the JIF or other journal based metrics we are either guided by  
30 invalid or weak arguments or in fact consider our uncertainty about the quality of the work and  
31 not the quality itself.

32

## Introduction

33

34

35

36

37

38

39

40

41

42

43

44

45

46

47

48

49

50

51

The journal impact factor (JIF) was initially used to help librarians make decisions about journals (Garfield, 2006). However, during the last decades the usage of the JIF has significantly changed. In deviating from its original purpose it is now widely used to evaluate the quality of individual publications and the work of scientists (Amin & Mabe, 2003; Arnold & Fowler, 2010). Since then, the measure itself has been criticized for various reasons. For example, it is well known that the JIF is an inaccurate estimate for the expected number of citations of an article within a specific journal (Callaway, 2016; Larivière et al., 2016) and that it is relatively easy to manipulate (McVeigh & Mann, 2009; Tort, Targino, & Amaral, 2012). Nonetheless, the JIF has deeply affected the work of scientists and decision making in academia. Scientists get jobs, tenure, grants, and bonuses based on the impact of the journals they are publishing their manuscripts in, outgrowths' which were critically discussed in many previous reviews, comments and editorials (Brembs, Button, & Munafò, 2013; Casadevall & Fang, 2014; Della Sala & Crawford, 2007; DePellegrin & Johnston, 2015; Lehmann, Jackson, & Lautrup, 2006; Reich, 2013; Seglen, 1997; Simons, 2008; Werner, 2015). Notably, the JIF has also been explicitly referred to as a tool to decide how to distribute funds across institutions, for example in Germany (DFG, 2004), and thereby affects policy making on a much larger scale.

"For the calculation of the performance-based bonus of the unit providing the service (department or clinic) the original publications may be used with the unweighted impact factor of the publication organ, in the sense of a step-wise introduction of quality criteria.

52           Thereby, a first- and last authorship may be considered with one third each and the  
53           remaining third can be distributed across all remaining authors [...]."<sup>1</sup>  
54           Besides such explicit usage of the JIF for evaluating scientific excellence, the JIF also  
55           implicitly affects other measures which have been suggested to better approximate the quality of  
56           a scientist's work or of a specific study (e.g. the h-index, Hirsch, 2005 and the Relative Citation  
57           Ratio (RCR), Hutchins, Yuan, Anderson, & Santangelo, 2015). For example, there is some  
58           evidence that the number of citations of an article is influenced by the JIF of the journal where  
59           the article was published, regardless of the quality of the article itself (Callaham, Wears, &  
60           Weber, 2002; Cantrill, 2016). This implies that measures that are based on the citations of the  
61           individual articles are still influenced by the JIF of the publication organ. With the many different  
62           ways of how the JIF can influence decision making in academia, it is not surprising that empirical  
63           data now demonstrate the JIF to be one of the most powerful predictors for academic success  
64           (Van Dijk, Manor, & Carey, 2014). We could recently show that some scientists may have  
65           adapted to these reward principles in their environment by showing a greater reward signal in the  
66           brain's reward structures in the prospect of an own high impact publication (Paulus, Rademacher,  
67           Schäfer, Müller-Pinzler, & Krach, 2015).

68           In line with the rising initiatives to prevent the use of the JIF for evaluating the quality of  
69           science (see e.g. the DORA initiative, Alberts, 2013, Cagan, 2013 or see the report of the German  
70           Science Council, 2015), we have considerable doubts that the arguments in support of using the

---

<sup>1</sup>"Für die Berechnung der LOM [leistungsorientierte Mittel; remark of authors] der jeweiligen leistungserbringenden Einheit (Abteilung bzw. Klinik) kann im Sinne einer stufenweisen Einführung von Qualitätskriterien die Bewertung erfolgter Original-Publikationen unter Verwendung des ungewichteten Impact Faktor der jeweiligen Publikationsorgane (JIF) erfolgen. Dabei können Erst- und Letztautorschaft mit je einem Drittel berücksichtigt werden; das verbleibende Drittel kann auf alle übrigen Autoren verteilt werden [...]." (German Research Foundation, 2004, p. 15).

71 JIF for measuring scientific excellence are justified. In this comment we want to look at the  
72 problem of using the JIF from a different perspective and carefully (re)evaluate the arguments for  
73 its use as an estimate of scientific quality. Thereby, we hope to better understand the beliefs about  
74 the JIF that influence decisions in academia and the implications of policies that use the JIF to  
75 assess and remunerate scientific quality. Beyond the specific case of the JIF, this exercise might  
76 also help to specify more general misconceptions when using journal based properties to evaluate  
77 science, in order to overcome incentive structures based on journal based metrics altogether.

### 78 **Deductive fallacy when using the JIF**

79 A basic belief when using the JIF for evaluating the quality of a specific manuscript  
80 seems to be that (1) if a paper is published in a high impact factor journal ( $p$ ) then the paper is of  
81 high quality ( $q$ )<sup>2</sup>. Why would scientists believe this? A straightforward reason is the idea that it is  
82 more difficult to publish in a high impact factor journal because higher standards of research  
83 quality and novelty have to be passed in order to be accepted. The average number of citations of  
84 a journal's articles within in a specific time period signals the average breadth of interest in these  
85 articles during that time period, which can of course be affected by many factors other than  
86 research quality. But as a first approximation, let us suppose that belief (1) is the case. What can  
87 we conclude from it?

88 If we see a paper published in a high impact factor journal, we could then draw the  
89 deductively valid inference of modus ponens (MP: *if  $p$  then  $q$ ,  $p$ , therefore  $q$* )<sup>3</sup> and conclude that

---

<sup>2</sup> When we speak of "high" and "low" impact in this paper, the arguments we make are independent of whether "high" and "low" refer to the absolute JIF of a journal, or to the JIF relative to a specific research domain.

<sup>3</sup> Here  $p$  and  $q$  stand for arbitrary propositions. For example,  $p$  might stand for "This paper is published in a high impact factor journal" and  $q$  for "This paper is of high quality".

90 the paper is of high quality. But what if we see a paper published in a low impact factor journal?  
91 Can we draw any conclusions in this case?

92 One aspect of the impact factor fallacy could be operationalized as the tendency to draw  
93 the deductively invalid inference of *denial of the antecedent* (DA: *if p then q, not-p, therefore*  
94 *not-q*). This inference is deductively invalid because it is logically consistent for the premises *if p*  
95 *then q* and *not-p* to be true and yet the conclusion *not-q* to be false. When the premises of an  
96 inference can be true and at the same time the conclusion false, the inference does not preserve  
97 truth when going from premises to conclusion. In order to argue that the conclusion is not false in  
98 a particular case, we would therefore have to go beyond this argument and provide further  
99 information that might increase support for the conclusion.

100 For the more realistic case that the premises and conclusion are uncertain, such that they  
101 can not only be either true or false, but can be held with varying degrees of belief, the inference  
102 of DA is probabilistically invalid (p-invalid) because there are coherent<sup>4</sup> probability assignments  
103 to premises and conclusion for which the probability of the conclusion is lower than the sum of  
104 the probabilities of the premises (Adams, 1998; Over, 2016). Therefore, just like in the binary  
105 case DA does not preserve truth from premises to conclusion, in the probabilistic case DA does  
106 not preserve probability from premises to conclusion, so that it would be warranted to have a high  
107 degree of belief in the premises and yet a very low degree of belief in the conclusion. In order to  
108 justify the conclusion in a particular instantiation of the argument, we would have to bring further  
109 information into the discussion beyond that contained in the premises. Applied to the JIF  
110 example, suppose we assume that if a paper is published in a high impact factor journal, it is of

---

<sup>4</sup> Two statements are *coherent* if and only if they respect the axioms of probability theory. For example, these axioms state that if we believe it is 80% likely to rain, then in order for our beliefs to be coherent we should also be willing to believe that it is 20% likely not to rain, otherwise the probabilities involved would not sum up to 1.

111 high quality, and then encounter a paper that is published in a low impact factor journal. From  
112 this alone it is not justified to conclude that the paper we encountered is not of high quality. In  
113 order to draw such a conclusion we would require more information.

114 Denial of the antecedent (DA) is of course not the only inference one can draw on the  
115 basis of the conditional belief that if a paper is published in a high impact factor journal, then it is  
116 of high quality. A similar, deductively valid inference results if we add a further premise to DA:  
117 "If a paper is not published in a high impact factor journal, then it is not of high quality". One can  
118 combine this new conditional premise with the conditional premise that we already had: "If a  
119 paper is published in a high impact factor journal, then it is of high quality", to obtain the  
120 following biconditional premise: "A paper is published in a high impact factor journal if and only  
121 if it is of high quality". From this biconditional premise (or equivalently from the two conditional  
122 premises) together with the premise that a specific paper was not published in a high impact  
123 factor journal, one can indeed validly conclude that the paper is not of high quality. However, this  
124 inference will only be useful if one believes the biconditional premise to a non-negligible degree  
125 in the first place. If the biconditional premise is implausible, then any deductively valid  
126 conclusion based on it will also tend to be implausible, precisely because it follows logically  
127 from an implausible starting assumption. Considering that most scientists are likely to agree that  
128 it is not only implausible but false that a paper is of high quality if and only if it is published in a  
129 high impact factor journal, the fact that the inference from this biconditional is valid has no use  
130 for practical purposes.

### 131 **Inductive fallacies when using the JIF**

132 One could argue that deduction, and with it logical validity, has little impact on actual  
133 reasoning and decision making outside of the mathematics classroom, and that therefore the  
134 inferences we should be looking at when analysing the use of the JIF in the practice of science

135 should rather be inductive (Baratgin & Politzer, 2016; Chater, Oaksford, Hahn, & Heit, 2011;  
136 Evans, 2002; Oaksford & Hahn, 2007).

137 An inductive inference that might describe well the use of the impact factor is the  
138 informal fallacy of the *argument from ignorance* (or its Latin equivalent "ad ignorantiam"). This  
139 argument tries to justify a conclusion by pointing out that there is no evidence against it. Typical  
140 examples could be "No side effects were found for this treatment in clinical trials. Therefore this  
141 treatment is safe" or "No one has proven that ghosts do not exist. Therefore ghosts exist" (Hahn  
142 & Oaksford, 2007; Oaksford & Hahn, 2004, 2007). In the case of the JIF, if a paper comes from a  
143 high impact journal this can be seen as a sign suggesting it is an excellent piece of work. But as  
144 we saw above in the discussion of DA, this does not imply that if the paper was published in a  
145 low impact factor journal this is a sign suggesting that the quality of the paper is low. A more  
146 precise description of the situation would be that a low impact factor journal lacks the sign of  
147 high quality that a high JIF provides. If a paper is published in a low impact journal then we have  
148 less information about its quality, rather than having information suggesting that its quality is  
149 low. It is an argument from ignorance to use the absence of impact factor based evidence for high  
150 quality to conclude that a paper is of low quality.

151 However, the argument from ignorance is not always a bad argument (Hahn & Oaksford,  
152 2007, 2012). Its strength depends on how informative the lack of information about something  
153 being the case is in the situation at hand. Suppose we search a book in a library catalogue and do  
154 not find it. In this case it is reasonable to use the lack of information about the book in the  
155 catalogue to conclude that the book is not in the library. Similarly, if we look at a train timetable  
156 and do not see a particular town listed, it is reasonable to conclude that the train does not stop in  
157 that town. However, suppose we are planning a party and have invited the whole department, in  
158 the hope that a particular person we are attracted to will attend. In this case a lack of information



159 indicating that the person will come does not warrant the conclusion that the person will not  
160 come. Catalogues and timetables are fairly closed environments in which we can expect all  
161 relevant information to be stated explicitly. But environments like those of social interactions or  
162 research endeavours are typically more open, so that the absence of information about something  
163 being the case simply does not warrant us to conclude that it is not the case. A consequence for  
164 the JIF would be that low impact publications do not signal low research quality, but rather  
165 uncertainty about the quality and the need to gather more information in order to be able to  
166 determine research quality.

167         Two further inductive inferences that might be relevant in accounting for the use of the  
168 JIF are the informal fallacies of the *argument from authority* (also called by the Latin name "*ad*  
169 *verecundiam*"), and of the *ad hominem argument* (Bhatia & Oaksford, 2015; Hahn & Hornikx,  
170 2016). The argument from authority tries to justify a conclusion by pointing out that some expert  
171 or authority endorses the conclusion. Typical examples could be "Scientist x says that the  
172 treatment is safe. Therefore the treatment is safe", "My parents say that Santa Claus exists.  
173 Therefore Santa Claus exists" or "My peers say that clothing item x is great. Therefore clothing  
174 item x is great". In the case of the JIF, a high impact factor of a journal would play the role of an  
175 authority for the quality of the papers within it.

176         In contrast, the *ad hominem argument* tries to justify the rejection of a conclusion by  
177 pointing to personal attributes of a person that endorses it. Typical examples could be "The new  
178 treatment was developed by a person with no formal degree in the subject. Therefore the  
179 treatment is not safe", or "A person without a driver's license says "don't drink alcohol while  
180 driving". Therefore, it is false that you should not drink alcohol while driving". In the case of the  
181 JIF, a low impact factor would be used to give a journal a reputation of low quality, and this low  
182 quality reputation would then be transferred to the papers within it.

183 Like the argument from ignorance, the argument from expert opinion and the ad hominem  
184 argument are not always bad arguments. Their quality varies as a function of how informative the  
185 authority status, or the personal attributes of the instance endorsing them, is for the problem at  
186 hand. Policy decisions are routinely based on the advice of experts, and there seems to be  
187 agreement that this is a good thing to do, as long as the experts are really considered experts in  
188 their field and their advice is not biased (Harris, Hahn, Madsen, & Hsu, 2015; c. f. Sloman &  
189 Fernbach, in press). Dismissing an argument because of personal attributes of a person endorsing  
190 it is often more difficult, because it has to be made plausible that those attributes are relevant to  
191 the quality of the argument. For example, that one does not need to be a mother to be qualified  
192 for being prime minister seems obvious, whereas a case of a person applying to a position against  
193 gender discrimination, who in his private life beats his wife, is likely to be more controversial. In  
194 the case of the JIF, we would have to justify why we think that a low impact factor indicates that  
195 a particular journal is of low quality, and why this low quality can be transferred to a particular  
196 paper within it. Such a judgment requires further information about the journal and about the  
197 paper at hand to be justified, which is usually not provided. Thus, whereas a high impact factor  
198 may add to the reputation of a journal, a low impact factor does not warrant a bad reputation, but  
199 rather provides insufficient information about reputation (see Table 1 for examples of the  
200 inductive and deductive fallacies as discussed here).

201 -----

202 Insert Table 1 about here

203 -----

204 Until now we have discussed inferences on the basis of the belief that if a paper is  
205 published in a high impact factor journal, then it is of high quality. But although this belief can  
206 sometimes be useful as a quick approximation or rule of thumb, it is often itself not warranted.

207 Not only because the mean number of citations of the papers in a journal is an indicator of the  
208 average breadth of interest in these papers during the first years after publication, which is not the  
209 same as research quality (e. g. a high quality paper may have low citation rates because it is  
210 addressed to a small, highly specialised audience, or because its significance is only realised five  
211 years after publication; and a paper may have high citation rates because of highly consequential  
212 flaws within it). But more specifically, it is often not warranted because the inference from a  
213 metric defined at the journal level to the features of an individual paper within that journal  
214 involves an ecological fallacy.

### 215 **Ecological fallacy when using the JIP**

216 Finally, the evaluation of manuscripts based on the JIF bears an ecological fallacy. When  
217 comparing group level data, such as the average citations of journals, it is difficult up to  
218 impossible to infer the likelihood of the outcome for comparisons on the individual level, such as  
219 citations of manuscripts. In fact, it is relatively easy to think of examples where the likelihood to  
220 find a manuscript with more than twelve citations per year in a lower impact journal exceeds the  
221 likelihood of finding such manuscript in a higher impact journal. This type of ecological fallacy  
222 occurs when the distribution of citations is heavily and differentially skewed within each higher  
223 level unit, i.e. the journals. This is typically the case when it comes to citation rates of journals  
224 [see e.g. Lariviere et al., 2016]. Accordingly, a journal with a JIF of twelve might contain few  
225 manuscripts that were cited several hundred times in the previous two years, but many others that  
226 were not cited at all during the same period. Such a citation pattern would result in a heavily  
227 skewed distribution of citations per article, while another journal with a JIF of ten might have a  
228 normally distributed citation rate of articles for the same time period. Without further knowledge  
229 of the distribution of citations within the journals in a given year (i.e. information at the  
230 individual level) concluding that a manuscript in the journal with a higher JIF is of better quality

231 (or of broader interest) involves an ecological fallacy, because it is possible that the likelihood of  
232 finding a manuscript with more citations in the lower impact journal is in fact similar or even  
233 higher.

### 234 **Concluding remarks**

235 With this comment, we hope to have highlighted some misconceptions in the beliefs and  
236 arguments involved in using journal based metrics, and specifically the JIF, for evaluating the  
237 work of scientists. While some of the thoughts described here are introduced to illustrate the most  
238 controversial arguments, others better approximate the reality of decision making in academia. In  
239 this exercise, it is surprising to see many political and academic institutions as well as scientists  
240 having believed for so long that they are evaluating the "quality of science" while they are keen  
241 to provide weak arguments, draw invalid conclusions, or weigh their lack of information and  
242 uncertainty about the subject when using the JIF.

243 From an economic perspective, however, it might in fact be a successful strategy to  
244 minimize the uncertainty about the quality of the evaluated work, person, or institution by relying  
245 on the JIF, and it might also be better to have a weak argument than to have no argument.  
246 Evaluating the quality of a scientist's work surely is a time consuming process and it takes much  
247 more effort than simply comparing impact factors. Accordingly, deans, commissions, or  
248 institutions which might not have the resources for an actual assessment of "scientific excellence"  
249 have reasons to rely on the JIF. However, it should be clear that those decisions are not based on  
250 the *quality* of the scientific contribution per se but, optimistically, somehow integrate the  
251 *availability of information* about the quality. This distinction makes an important difference for  
252 communicating and justifying decisions in academia. As an illustrative example, one can  
253 compare the situation of deciding that a candidate does not deserve tenure because one thinks that  
254 the quality of the work was not good enough, to deciding that a candidate does not deserve tenure

255 because one lacks information and is uncertain whether the quality of the work was good enough.  
256 While persons and institutions usually *communicate* as if they were following the first argument,  
257 their *justification* most often implies the latter if they base their decisions on journal based  
258 metrics.

259         The JIF is arguably the most popular journal based metric of our times, but it has already  
260 been subject to severe criticism in the past (Della Sala & Crawford, 2007; DePellegrin &  
261 Johnston, 2015; Lehmann et al., 2006; Reich, 2013; Seglen, 1997; Simons, 2008; Werner, 2015).  
262 As a result, it seems that individuals and institutions within the scientific community are ready to  
263 shake off the JIF at some point in the nearer future (Alberts, 2013; Cagan, 2013; Callaway,  
264 2016). Notably, the problems described here apply in one way or another to any journal based  
265 assessment. If journals would drop out of the ‘impact factor game’ (PLoS Medicine Editorial,  
266 2006) publications in some journals might still be regarded as more valuable than in others. It is  
267 difficult to quantify those influences, but having a publication in one of the ‘golden club’ journals  
268 (Reich, 2013) could simply replace the metric of the JIF with another, more implicit qualitative  
269 measure for distinguishing prestigious from less prestigious journals. Thereby, the fallacies and  
270 problems described above would continue to govern decision making in academia as long as we  
271 base them on any kind of journal based assessment.

272

273

274

## Acknowledgments

275 We would like to thank Inês Mares and Mike Oaksford for helpful comments and  
276 discussion on an earlier draft of this manuscript.

277

278

## References

- 279 Adams, E. W. (1998). *A primer of probability logic*. Stanford: CSLI.
- 280 Alberts, B. (2013). Impact Factor Distortions. *Science (New York, N.Y.)*, 340(May), 787.  
281 <http://doi.org/10.1126/science.1240319>
- 282 Amin, M., & Mabe, M. A. (2003). Impact factors: use and abuse. *Medicina*, 63(4), 347–54.
- 283 Arnold, D. N., & Fowler, K. K. (2010). Nefarious Numbers.
- 284 Baratgin, J., & Politzer, G. (2016). Logic, probability and inference: A methodology for a new  
285 paradigm. In L. Macchi, M. Bagassi, & R. Viale (Eds.), *Cognitive unconscious and human*  
286 *rationality*. Cambridge, MA: MIT Press.
- 287 Bhatia, J.-S., & Oaksford, M. (2015). Discounting testimony with the argument ad hominem and  
288 a Bayesian congruent prior model. *Journal of Experimental Psychology. Learning, Memory,*  
289 *and Cognition*, 41(5), 1548–59. <http://doi.org/10.1037/xlm0000151>
- 290 Brembs, B., Button, K., & Munafò, M. (2013). Deep impact: unintended consequences of journal  
291 rank. *Frontiers in Human Neuroscience*, 7, 291. <http://doi.org/10.3389/fnhum.2013.00291>
- 292 Cagan, R. (2013). The San Francisco Declaration on Research Assessment. *Disease Models &*  
293 *Mechanisms*, 6(4), 869–870. <http://doi.org/10.1242/dmm.012955>
- 294 Callaham, M., Wears, R. L., & Weber, E. (2002). Journal prestige, publication bias, and other  
295 characteristics associated with citation of published studies in peer-reviewed journals.  
296 *JAMA*: *The Journal of the American Medical Association*, 287(21), 2847–2850.  
297 <http://doi.org/10.1001/jama.287.21.2847>
- 298 Callaway, E. (2016). Beat it, impact factor! Publishing elite turns against controversial metric.  
299 *Nature*, 535(7611), 210–1. <http://doi.org/10.1038/nature.2016.20224>
- 300 Cantrill, S. (2016). Imperfect impact.
- 301 Casadevall, A., & Fang, F. C. (2014). Causes for the Persistence of Impact Factor Mania. *mBio*,  
302 5(3), e01342–14–e01342–14. <http://doi.org/10.1128/mBio.01342-14>
- 303 Chater, N., Oaksford, M., Hahn, U., & Heit, E. (2011). Inductive logic and empirical psychology.  
304 In D. M. Gabbay & J. Woods (Eds.), *Handbook of the History of Logic, Vol. 10: Inductive*  
305 *Logic* (pp. 553–624). Amsterdam: North Holland.
- 306 Council, W. G. S. (2015). Empfehlungen zu wissenschaftlicher Integrität: Positionspapier.

- 307 Stuttgart.
- 308 Della Sala, S., & Crawford, J. R. (2007). A double dissociation between impact factor and cited  
309 half life. *Cortex*, 43, 174–175. [http://doi.org/10.1016/S0010-9452\(08\)70473-8](http://doi.org/10.1016/S0010-9452(08)70473-8)
- 310 DePellegrin, T. A., & Johnston, M. (2015). An Arbitrary Line in the Sand: Rising Scientists  
311 Confront the Impact Factor. *Genetics*, 201(3), 811–813.  
312 <http://doi.org/10.1534/genetics.115.182261>
- 313 DFG. (2004). Empfehlungen zu einer »Leistungsorientierten Mittelvergabe« (LOM) an den  
314 Medizinischen Fakultäten: Stellungnahme der Senatskommission für Klinische Forschung  
315 der Deutschen Forschungsgemeinschaft. Bonn: Deutsche Forschungsgemeinschaft.
- 316 Editorial. (2006). The Impact Factor Game. *PLoS Medicine*, 3(6), e291.  
317 <http://doi.org/10.1371/journal.pmed.0030291>
- 318 Evans, J. S. B. T. (2002). Logic and human reasoning: an assessment of the deduction paradigm.  
319 *Psychological Bulletin*, 128(6), 978–96.
- 320 Garfield, E. (2006). The history and meaning of the journal impact factor. *JAMA*: *The Journal*  
321 *of the American Medical Association*, 295, 90–93. <http://doi.org/10.1001/jama.295.1.90>
- 322 German Science Foundation. (2004). Empfehlungen zu einer »Leistungsorientierten  
323 Mittelvergabe« (LOM) an den Medizinischen Fakultäten: Stellungnahme der  
324 Senatskommission für Klinische Forschung der Deutschen Forschungsgemeinschaft  
325 [Recommendations for performance-related bonuses at the medi. Bonn: Deutsche  
326 Forschungsgemeinschaft.
- 327 Hahn, U., & Hornikx, J. (2016). A normative framework for argument quality: argumentation  
328 schemes with a Bayesian foundation. *Synthese*, 193(6), 1833–1873.  
329 <http://doi.org/10.1007/s11229-015-0815-0>
- 330 Hahn, U., & Oaksford, M. (2007). The rationality of informal argumentation: a Bayesian  
331 approach to reasoning fallacies. *Psychological Review*, 114(3), 704–32.  
332 <http://doi.org/10.1037/0033-295X.114.3.704>
- 333 Hahn, U., & Oaksford, M. (2012). *Rational Argument*. (K. J. Holyoak & R. G. Morrison,  
334 Eds.) *The Oxford handbook of thinking and reasoning*. New York, NY: Oxford University  
335 Press. <http://doi.org/10.1093/oxfordhb/9780199734689.013.0015>
- 336 Harris, A. J. L., Hahn, U., Madsen, J. K., & Hsu, A. S. (2015). The appeal to expert opinion:  
337 Quantitative support for a Bayesian network approach. *Cognitive Science*, 1-38.
- 338 Hirsch, J. E. (2005). An index to quantify an individual's scientific research output. *Proceedings*  
339 *of the National Academy of Sciences of the United States of America*, 102, 16569–16572.  
340 <http://doi.org/10.1073/pnas.0507655102>
- 341 Hutchins, B. I., Yuan, X., Anderson, J. M., & Santangelo, G. M. (2015). *Relative Citation Ratio*  
342 *(RCR): A new metric that uses citation rates to measure influence at the article level*.
- 343 Larivière, V., Kiermer, V., Maccallum, C. J., McNutt, M., Patterson, M., Pulverer, B., ... Curry,

- 344 S. (2016). A simple proposal for the publication of journal citation distributions. *Bior.*  
345 <http://doi.org/10.1101/062109>
- 346 Lehmann, S., Jackson, A. D., & Lautrup, B. E. (2006). Measures for measures. *Nature*,  
347 *444*(December), 1003–1004. <http://doi.org/10.1038/4441003a>
- 348 McVeigh, M. E., & Mann, S. J. (2009). The journal impact factor denominator. *JAMA: The*  
349 *Journal of the American Medical Association*, *302*(10), 1107–1109.
- 350 Oaksford, M., & Hahn, U. (2004). A Bayesian approach to the argument from ignorance.  
351 *Canadian Journal of Experimental Psychology*, *58*(2), 75–85.
- 352 Oaksford, M., & Hahn, U. (2007). Induction, Deduction, and Argument Strength in Human  
353 Reasoning and Argumentation. In A. Feeney & E. Heit (Eds.), *Inductive Reasoning* (pp.  
354 269–301). Cambridge: Cambridge University Press.  
355 <http://doi.org/10.1017/CBO9780511619304.012>
- 356 Over, D. (2016). The Paradigm Shift in the Psychology of Reasoning. In L. Macchi, M. Bagassi,  
357 & R. Viale (Eds.), *Cognitive Unconscious and Human Rationality* (pp. 79–99). Cambridge,  
358 MA: MIT Press.
- 359 Paulus, F. M., Rademacher, L., Schäfer, T. A. J., Müller-Pinzler, L., & Krach, S. (2015). Journal  
360 Impact Factor Shapes Scientists' Reward Signal in the Prospect of Publication. *PLOS ONE*,  
361 *10*(11), e0142537. <http://doi.org/10.1371/journal.pone.0142537>
- 362 Reich, E. S. (2013). Science publishing: The golden club. *Nature*, *502*, 291–293.  
363 <http://doi.org/10.1038/502291a>
- 364 Seglen, P. O. (1997). Why the impact factor of journals should not be used for evaluating  
365 research. *BMJ*, *314*(7079), 498–502.
- 366 Simons, K. (2008). The misused impact factor. *Science (New York, N.Y.)*.  
367 <http://doi.org/10.1126/science.1165316>
- 368 Sloman, S., & Fernbach, P. (in press). The knowledge illusion: Why we never think alone. New  
369 York, US: Riverhead Books.
- 370 Tort, A. B. L., Targino, Z. H., & Amaral, O. B. (2012). Rising Publication Delays Inflate Journal  
371 Impact Factors. *PLoS ONE*, *7*. <http://doi.org/10.1371/journal.pone.0053374>
- 372 Van Dijk, D., Manor, O., & Carey, L. B. (2014). Publication metrics and success on the academic  
373 job market. *Current Biology*, *24*(11), 516–517. <http://doi.org/10.1016/j.cub.2014.04.039>
- 374 Werner, R. F. (2015). The focus on bibliometrics makes papers less useful, 2015.  
375  
376



## Tables

*Table 1. The deductive and inductive fallacies discussed in this paper.*

| Name                       | Form                                                                        | Plausible Example                                                                                          | Implausible Example                                                                                                                                   | Journal Impact Factor Example                                                                                                                                                                   |
|----------------------------|-----------------------------------------------------------------------------|------------------------------------------------------------------------------------------------------------|-------------------------------------------------------------------------------------------------------------------------------------------------------|-------------------------------------------------------------------------------------------------------------------------------------------------------------------------------------------------|
| <b>Deductive fallacy</b>   |                                                                             |                                                                                                            |                                                                                                                                                       |                                                                                                                                                                                                 |
| Denial of the antecedent   | <i>If p then q. Not-p. Therefore not-q.</i>                                 | If the glass falls down then it breaks. The glass does not fall down. Therefore, the glass does not break. | If you carry an umbrella then you stay dry. You do not carry an umbrella. Therefore, you do not stay dry.                                             | If a paper is published in a high impact factor journal, then it is of high quality. This paper is not published in a high impact factor journal. Therefore, this paper is not of high quality. |
| <b>Inductive fallacies</b> |                                                                             |                                                                                                            |                                                                                                                                                       |                                                                                                                                                                                                 |
| Argument from ignorance    | <i>It is not known that p is true (false). Therefore p is false (true).</i> | The book is not listed in the library catalogue. Therefore, the book is not in the library.                | No one has proven that ghosts do not exist. Therefore, ghosts exist.                                                                                  | This paper does not have the quality sign of having been published in a high impact factor journal. Therefore, this paper is not of high quality.                                               |
| Argument from authority    | <i>This expert says that p is true. Therefore p is true.</i>                | Medical experts say that this treatment is safe. Therefore, this treatment is safe.                        | My parents say that Santa Claus exists. Therefore, Santa Claus exists.                                                                                | This paper does not have the authority backing of having been published in a high impact factor journal. Therefore, this paper is not of high quality.                                          |
| Ad hominem argument        | <i>This untrustworthy person says that p is true. Therefore p is false.</i> | A person without training says that this treatment is safe. Therefore, this treatment is not safe.         | A person without a driver's license says "don't drink alcohol while driving". Therefore, it is false that you should not drink alcohol while driving. | This paper was published in a journal with low quality reputation due to a low impact factor. Therefore, this paper is not of high quality.                                                     |
